# Supplementary material for: Identification of Critical m6A RNA Methylation Regulators with Prognostic Value in Lower‐Grade Glioma
Source: Hindawi journal article supplement (doi:10.1155/2021/9959212), 2021-01-01
Supplement: f1 [file 9959212.f1.pdf]

**consensus CDF**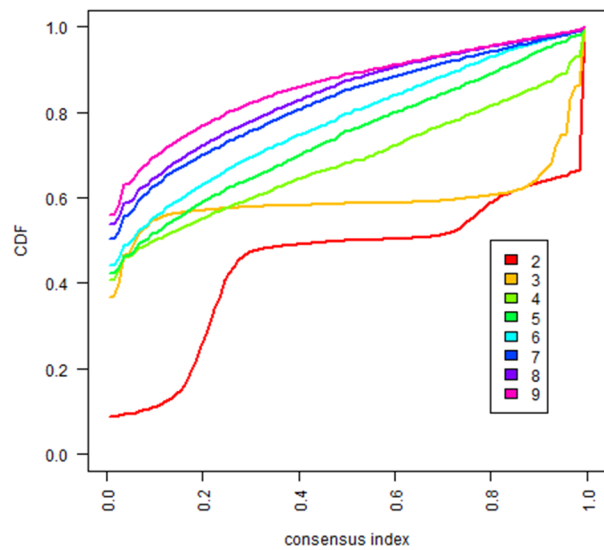

(a)

**Delta area**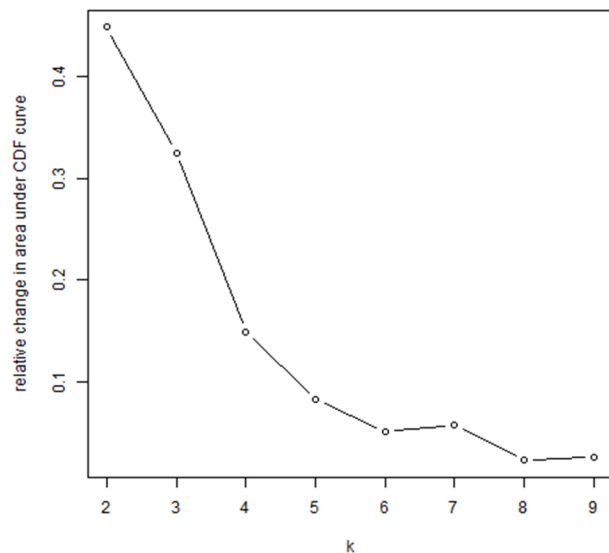

(b)

**tracking plot**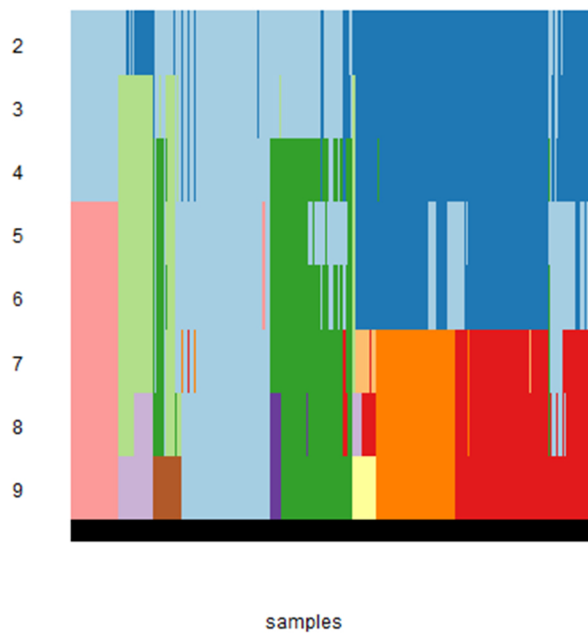

(c)

**consensus matrix k=2**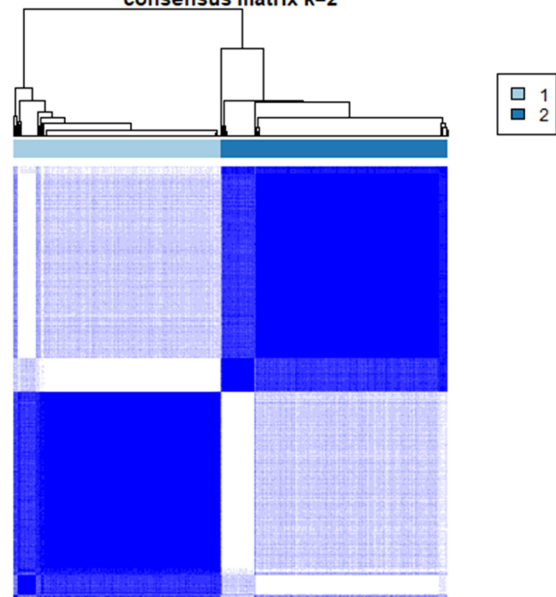

(d)
